# Supplementary material
Source: publisher figshare collection journal article supplement (https://plos.figshare.com/ndownloader/files/30770141)
Supplement: Supplementary file [file 30770141]

**Table S1. Median values and 95% confidence interval of the posterior distributions of the inferred parameters using the bdmm BEAST2 package.** The parameters  $R_1^{t1}$ ,  $R_1^{t2}$  and  $R_1^{t3}$  are the reproduction numbers for the non-MSM hosts during the first, second and last temporal intervals respectively. The parameter  $R_2^{t3}$  is the reproduction number for the MSM hosts epidemic. The parameters given by  $1/(\gamma_1 + \epsilon_1)$  and  $1/(\gamma_2 + \epsilon_2)$  correspond to the effective duration of infectious period of non-MSM and MSM hosts respectively, where  $\gamma_1$  and  $\gamma_2$  are the end of infectiousness rates and  $\epsilon_1$  and  $\epsilon_2$  are the sampling proportions of non-MSM and MSM hosts.  $t_2$  corresponds to the date of the emergence of the MSM hosts epidemic.

|        | $R_1^{t1}$   | $R_1^{t2}$   | $R_1^{t3}$   | $R_2^{t3}$   | $1/(\gamma_1 + \epsilon_1)$ | $1/(\gamma_2 + \epsilon_2)$ | $t_2$              |
|--------|--------------|--------------|--------------|--------------|-----------------------------|-----------------------------|--------------------|
| median | 1.54         | 1.51         | 0.68         | 1.05         | 2.0                         | 1.50                        | 2001.91            |
| 95% CI | [1.37; 1.77] | [1.11; 2.55] | [0.20; 0.94] | [0.67; 1.67] | [1.45; 2.54]                | [1.23; 1.81]                | [1998.38; 2006.00] |
